# Supplementary material for: Measurements of DNA Methylation at Seven Loci in Various Tissues of CD1 Mice
Source: PubMed Central journal article supplement (PMC3436786; doi:10.1371/journal.pone.0044585), 2012-09-07
Supplement: pone.0044585.s001.pdf [file pone.0044585.s001.pdf]

## Myosin light chain

### A) Myosin light chain, Original sequence (accession n. X12972):

```
1141 acatacacaCGtgggagcaac tcttctgcac aataaatttg gacaggtaaa ggtagaaaa
1201 gtgtgtacca catgctatac accatagtag gggctggaat gaccaaaggg tCGttcttga
                                     mRNA start
1261 ataacttCGc acctgggtgg cccaggtccc ctgatta [aga gCGaggggtg gtaggatctg
1321 tgttgaggca ctttttcaag tagggagggg ccttggtgt gtgcatggtg ggaggctctt
1381 ggacatttgt atgcattgtc tgggtgCGct gttcagggcc tgtcagtgcc ccagctgggt
1441 ctaggggaag aggctgtCGt gtgtcttgtc tctgtggtcc CGtttcCGgg tgttcacatt
1501 catgtatgtc tgtgtgggtc tgagtgagtg tctgtatatt tatgtctggg tgtttgtatg
1561 cactagtgta tgagtgtctg gatacagcag gcagctgcag tccactcaca gggcccag
1621 gtctccagga acacccaag cacaCGtggc actccctCGa ggactgtcct ccagactagt
1681 tcaacaggct ctttttacia aactcctaag actagtgtct caggttttac acaccacac
1741 tCGcacaCGC GCGcacacac acacacatgt gtgcacacac acatacatac aactggatt
```

### B) Bisulfite treated sequence with primer annealing sites, bisulfite primer binding sites marked yellow, single nucleotide extension primer binding sites marked red:

```
1141 atatatataC Gtgggagtaat ttttttgtat aataaatttg gataggtaaa ggtagaaaa
                                     Bisulfite forward primer →
1201 gtgtgtatta tatgttatat attatagtag gggttggaat gattaaagg tCGtttttga
1261 ataatttCGt atttgggtgg tttagggttt ttgattaaga gCGaggggtg gtaggatttg
1321 tgttgaggta tttttttaag tagggagggg ttttggttgt gtgtatggtg ggaggttttt
                                     SNUPE primer 1 →
1381 ggatatttgt atgtattggt tgggtgCGtt gtttagggtt tgtagtggtt ttagttgggt
                                     SNUPE primer 2 →
1441 ttaggggaag aggttgtCGt gtgttttgtt tttgtggttt CGttttCGgg tgtttatatt
1501 tatgtatggt tgtgtgggtt tgagtgagtg tttgtatatt tatgtttggg tgtttgtatg
1561 tattagtgta tgagtgtttg gatatagtag gtagttgtag tttatttata gggttttagg
                                     Bisulfite reverse primer ←
1621 gtttttagga atattttaag tataCGtggg attttttCGa ggattgtttt ttagattagt
1681 ttaatataggtt ttttttataa aatttttaag attagtgttt taggttttat atatttatat
1741 tCGtataCGt gCGtatatat atatatatgt gtgtatatat atatatatat atattggatt
```

## Alpha actin

### A) Alpha actin, Original sequence (accession n. M12347:)

361 ggcaggtcag caatCGtgtg tccagggtggg cagatctggg gagacccttc aaacaggtaa  
421 atcttgggaa gtacagacca gCGgtcaaag cagtgcacct tggcccagca cagcccttcC  
481 Gtgagccttg gagccagttg ggaggggag acagctgggg atactctcca tataCGgcct  
541 ggtcCGgtcc tagctacctg ggccagggca gtccctctct tcttttgtca gtgcaggaga  
601 ccCGggCGgg acccaggctg agaaccagcC Gaaggaaggg actctagtgc cCGacaccca  
661 aatatggctt gggaagggca gcaacattct tCGgggCGgt gtggggagag ctccCGggac  
721 tatataaaaa cctgtgcaag gggacaggCG gtc [acaCGga CGtaagcctc acttcctacc  
781 ctCGgcaccc agggcagagt cagagcagca ggtagggtgg aggtggggag ggtgacctg  
841 agaccagca aagaaagcta ttgagccttg gttgtattta gcaactgagtt ctggaaat  
901 ctccaaactc acatccagcc cttttgtga ctgggcattt aggatatgcc tgggggtctg

### B) Bisulfite treated sequence with primer annealing sites, bisulfite primer binding sites marked yellow, single nucleotide extension primer binding sites marked red:

361 ggtaggttag taatCGtgtg tttagggtggg tagatttggg gagatntttt aataggtaa  
421 attttgggaa gtatagatta gCGgttaaag tagtgatttt tggtttagta tagttttttt  
481 gtgagttttg gagttagttg ggagggtag atagttggg atatttttta tataCGgttt  
541 ggttCGgttt tagttatttg ggttagggta gttttttttt tttttggtta gtgtaggaga  
601 ttCGggCGgg atttaggttg agaattagt C Gaaggaagg attttagtgt tCGatattta  
661 aatatggttt gggaagggta gtaatatttt tCGgggCGgt gtggggagag ttttCGggat  
721 tatataaaaa tttgtgtaag gggataggCG gttataCGga CGtaagtttt attttttatt  
781 ttCGgtattt agggtagagt tagagtagta ggtaggggtg aggtggggag ggtgatttg  
841 agatttagta aagaaagtta ttgagttttg gttgtattta gtattgagtt ttggaaat  
901 ttttaaattt atatttagtt tttttgtga ttgggtattt aggatatggt tgggggtttg

### Peg3

#### A) Peg3, Original Sequence (Accession n. AF105262)

2641 GtcaactcCG tgccttggCG ocaagctggt gccttgacaa cagcagtctg attggcaggg  
2701 tgtgggaggC Gtgggtgaggg cccaaagCGg ggaatgggggt cttggattgg ttagagagga  
2761 agctcCGcct ctgcagagga cctgacaag gaggtgtccC Gc [agcccttg ctgcagaCGc  
mRNA start  
2821 tggggagtca ggagtCGCGg gaggaCGagc atCGgaggag aagCGgagag atgtccacc  
2881 tgggctggtg gCGcCGcCGg gCGccCGggt cagtgtgggt gcactagact gcCGaccctg  
2941 gtCGgggtgt gtgCGtagag tgctgtgctc CGggaggtga gtcagcCGgc cacctggctg  
3001 ctctgcagca tgcaccctct tagatacCGt ctgcagagtt cagatggtgt ttgggggtgCG  
3061 ttgcCGCGgg ccaggggCGg cagaccatat caCGgctccc aagggttaact gacaaggctg  
3121 cagactgCGc cttCGggaag ggggaatcac caCGgagCGg cCGtgttgcC Gcagggatgc  
3181 catttaggtg acagggattt aaagtggtat tctataggtc caggcctCGg agcctcaggg

#### B) Bisulfite treated sequence with primer annealing sites, bisulfite primer binding sites marked yellow, single nucleotide extension primer binding sites marked red:

2641 gtttaatttCG tgttttggCG ttaagttggt gtt ttgataa tagtagtttg attggtaggg Bisulfite forward primer →  
2701 tgtgggaggC Gtgggtgaggg tttaaagCGg ggaatgggggt tttggattgg ttagagagga  
2761 agtttCGttt ttgtagagga ttttgataag gaggtgtttC Gtagtttttg ttgtagaCGt  
SNUPE primer 1 →  
2821 tggggagtta ggagtCGCGg gaggaCGagt atCGgaggag aagCGgagag atgtttattt  
SNUPE primer 2 →  
2881 tggggttgggtg gCGtCGtCGg gCGttCGggt tagtgtgggt gtattagatt gtCGattttg  
2941 gtCGgggtgt gtgCGtagag tggtgtggtt CGggaggtga gttagtCGgt tatttgggtg  
3001 tttttagtagta tgtatTTTTT tagatatCGt ttgtagagtt tagatggtgt ttgggggtgCG  
3061 ttgtCGCGgg ttaggggCGg tagattatat taCGg ttttt aagggttaatt gataagggtg ← Bisulfite reverse primer  
3121 tagattgCGt tttCGggaag ggggaattat taCGgagCGg tCGtgttgtC Gtagggatgt

## Snrpn

### A) Snrpn, Original Sequence (accession n.AF332579)

67681 aaaaatctgt gtgatgcttg caatcacttg ggagcaatth ttttaaaaaa ttaaatgtat  
67741 ttagtaatag gcaattatat ccattattcc agattgacag tgattttttt tttttaatac  
67801 aCGctcaaat ttcCGcagta ggaatgctca agcattcctt ttggtagctg ccttttgga  
67861 ggacattcCG gtcagagggga cagagacccc tgcattgCGg caaaaatgtg CGcatgtgca  
67921gccattgctt ggggaCGcatg CGtaggggagc CGCGCGataa acctgagcca ttgCGgca [ag  
mRNA start  
67981 actagCGcag agaggagagg gaggCGgaga tgccagaCGc ttggttctga ggagtgattt  
68041 gcaaCGcaat ggagCGagga aggtcagctg ggcttggtgga ttctagtagt gaaagtgcatt

### B) Bisulfite treated sequence with primer annealing sites, bisulfite primer binding sites marked yellow, single nucleotide extension primer binding sites marked red:

Bisulfite forward primer →  
67681 aaaaatctgt gtgatgcttg taattatttg ggagtaatth ttttaaaaaa ttaaatgtat  
67741 ttagtaatag gtaattatat ttattatttt agattgatag tgattttttt tttttaatac  
67801 aCGtttcaaat tttCGtagta ggaatgttta agtatttttt ttggcagttg ttttttgga

SNUPE primer 2 →  
67861 ggatatttCG gttagagggga tagagatttt tgtattgCGg taaaaatgtg CGtatgtgta  
SNUPE primer 1 →  
67921 gttattgctt ggggaCGcatg CGtaggggagc CGCGCGataa atttgagttt ttgCGgtaag

Bisulfite reverse primer ←  
67981 attagCGtag agaggagagg gaggCGgaga tgttagaCGt ttggttttga ggagtgattt  
68041 gtaaCGcaat ggagCGagga aggttagctg ggcttggtgga ttctagtagt gaaagtgcatt

## Lit1

### A) Lit1, Original Sequence (accession n.AJ271885)

45901 gaacatttCG aaCGgagccc ctcaactctca gcattaaaac agctaccaca taacaacaCG  
45961 tactccactc actaccttgg tgctggccac acCGggctac aaagctcagg ggtctccaga  
46021 ccCGattCGg tttcagctcc agtgCGttct gactCGgccC Ggggtttaga atcCGaaggc  
46081 ctgagcCGgt gtcctaggcc actcaccttg ggactCGacC GacctCGggg ctcaaagggc  
46141 ctcaagacca ccctgcttc tgtaagcctg ggccacaaag atggggaCGt ggaCGcaaaa  
46201 taCGagaact gagccaCGgc CGtgaaaCGa ggacCGgcCG tgaaaCGagg acCGagcCGt  
46261 aactgcaaaa CGaataCGga gccactgCGg caaaaCGaag atggagccca gcCGCGaaag  
46321 CGCGgcaCGa atcacctctg cttctggcCG tgagtgttg cCGCGaggag ggggaggcta  
46381 tgatgagCGC GgccaCGCGg acttgCGact tgtgcCGtgc tgactcagag aagaaaccCG  
46441 CGctgagaaa aaaaccatac ctaggagaac catgcCGaga aaaagaagCG ctgggaacca  
46501 agctgaacag aaaagctctc caagtagaat cacacagagg gaaaagaagC Gtgttgaaga

### B) Bisulfite treated sequence with primer annealing sites, bisulfite primer binding sites marked yellow, single nucleotide extension primer binding sites marked red:

45901 gaatatttCG aaCGgagttt tttatTTTTta gtattaaaat agttattata taataataCG  
45961 tattttatTTT attatTTTtgg tgttggttat atCGggttat aaagtttagg ggTTTTttaga  
46021 ttCGattCGg ttttagTTTT agtgCGTTTT gattCGgttC Ggggtttaga attCGaaggT  
46081 ttgagtCGgt gTTTTtaggtt atTTatTTTtgg ggattCGatC GatttCGggg tTTaaagggT  
46141 tTTaagatta tTTTTgTTTT tgtaagTTTtgg ggttataaag atggggaCGt ggaCGtaaaa  
46201 taCGagaatt gagttaCGgt CGtgaaaCGa ggatCGgtCG tgaaaCGagg atCGagtCGt  
46261 aattgtaaaa CGaataCGga gttattgCGg taaaaCGaag atggagtTTa gtCGCGaaag  
46321 CGCGgtaCGa attatTTTTtgg tTTTTggtCG tgagtgtTTtgg tCGCGaggag ggggaggTTa  
46381 tgatgagCGC GgttaCGCGg atttgCGatt tgtgtCGtgt tgatttagag aagaaattCG  
46441 CGttgagaaa aaaattatat ttaggagaat tatgtCGaga aaaagaagCG ttgggaatta  
46501 agttgaatag aaaagTTTTt taagtagaat tatatagagg gaaaagaagC Gtgttgaaga  
46561 aaaattgaga gaatttagta ggttaaaaaa aaatgttgag aagttaagtg gatCGCGtta

Bisulfite forward primer →

SNuPE primer 1 →

SNuPE primer 2 →

Bisulfite reverse primer ←

## Line-1

### A) Line-1 Original Sequence (accession n. D84391)

421 tCGccatctt ggtcCGggac cCGcCGaact taggaaatta gtctgaacag gtgagagggg  
481 gCGccagaga acctgacagc ctctggaaca ggcagaagca cagaggggct gaggcagcac  
541 cctgagtggg cCGgggacag cCGggccacct tcCGgacCGg aggacagggtg ccCGccCGgc  
601 tggggaggCG acctaagcca cagcagcagC GgtCGccatc ttgggtcCGgg accCGcCGaa  
661 cttaggaat tagtctgaac aggtgagagg gtgCGccaga gaacctgaca gcttctggaa  
721 caggCGgaag cacagaggCG ctgaggcagc accctgCGtg ggcCGgggac agcCGgccac  
781 cttcCGgacc agaggacagg tgcccaccCG gctggggagg CGgcctaagc cacagcagca  
841 gCGgtCGcca tcttggtcCG ggaccCGcCG aacttaggaa attagtctga acagggtgaga  
901 ggggtgCGcca gagaacctga cagcttctgg aacaggcaga agcacagagg ggctgaggca  
961 gcaccctgtg tgggcCGggg acagcCGgcc accttcCGga cCGgaggaca ggtgccacc  
1021 CGgctgggga ggCGgcctaa gccacagcag cagCGgtCGc catcttggtc cCGggactcc  
1081 aaggaactta ggaatctagt ctgcttaagt gagagtctgt accacctggg aactgcaaaa  
1141 gcaacacagt gtctgagaaa ggtctgttt tgggccttct tcttCGgcca ggaggagggtc

### B) Bisulfite treated sequence with primer annealing sites, bisulfite primer binding sites marked yellow, single nucleotide extension primer binding sites marked red:

421 tCGttatctt gggtCGggat tCGtCGaatt taggaaatta gtttgaatag gtgagagggg

Bisulfite forward primer →

481 gCGttagaga atttgatagt ttttggaaata ggtagaagta tagagggggtt gaggtagtat  
541 tttgagtggg tCGgggatag tCGgttatctt ttCGgatCGg aggatagggtg ttCGttCGgt  
601 tggggaggCG atttaagtta tagtagtagC GgtCGttatt ttgggttCGgg attCGtCGaa  
661 tttaggaat tagtttgaat aggtgagagg gtgCGttaga gaatttgata gtttttggaa  
721 taggCGgaag tatagaggCG ttgaggtagt attttgCGtg ggtCGgggat agtCGgttat  
781 ttttCGgatt agaggatagg tgtttattCG gttggggagg CGgtttaagt tatagtagta  
841 gCGgtCGtta ttttggttCG ggattCGtCG aatttaggaa attagtttga atagggtgaga  
901 ggggtgCGtta gagaatttga tagtttttgg aataggtaga agtatagagg ggttgaggta

SNuPE primer 1 →

SNuPE primer 2 →

961 gtatcttctg tgggtCGggg atagtCGggt atctttCGga tCGgaggata ggtgcttatt  
1021 CGggttgggga ggCGgcttaa gttatagtag tagCGgtCGt tattttggtt tCGggatctt

← Bisulfite reverse primer

1081 aaggaactta ggaatctagt ttgtttaagt gagagtttgt attatttggg aattgctaaa  
1141 gtaatatagt gttttagaaa ggttttgttt tgggtttttt ttttCGgtta ggaggagggtt

## IAP (LTR)

### A) Long Tandem repeat of IAP, Original Sequence (accession n. M17551)

```
1  tgttgggagc CGCGcccaca ttCGcCGtta caagatggCG ctgacagctg tgttctaagt
61  ggtaaacaaa taatctgCGc atatgcCGag ggtgggttctc tactccatgt gctctgcctt
121  cccCGTgaCG tcaactCGgc CGatgggctg cagccaatca gggagtgaca CGtcctaggC
181  Gaaatataac tctcctaaaa aagggaCGgg gtttCGtttt ctctctctct tgcctcttac
241  actcttgctc ctgaagatgt aagcaataaa gttttgcCGc agaagattct ggtctgtggt
301  gttcttctctg gcCGggCGtg agaaCGCGtc taataacaat tggtgacCGa attcCGggaC
361  Gagaaaaaac tCGggactgg CGcaaggaag atccctcatt ccagaaccag aactgCGggt
```

### B) Bisulfite treated sequence with primer annealing sites, bisulfite primer binding sites marked yellow, single nucleotide extension primer binding sites marked red:

```
1  tgttgggagt CGCGtttata ttCGTCGtta taagatggCG ttgatagttg tgttttaagt
61  ggtaaataaa taatttgCGt atatgtCGag ggtgggtttt tattttatgt gttttgtttt
                                     Bisulfite forward primer →
121  tttCGTgaCG ttaattCGgt CGatggggttg tagt taatta gggagtgata CGtttttaggC
                                     SNUPE primer 1 →
                                     SNUPE primer 2 →
181  Gaaatataaat ttttttaaaa aagggaCGgg gtttCGtttt tttttttttt tgttttttat
241  atttttgttt ttgaagatgt aagtaataaa gttttgtCGt agaagatttt ggtttggtggt
                                     ← Bisulfite reverse primer
301  gttttttttg gtCGggCGtg agaaCGCGtt taataataat tggtgatCGa atttCGggat
361  gagaaaaaat tCGggattgg CGtaaggaag attttttatt ttagaattag aattgCGggt
```
