# Supplementary material for: Measurements of DNA Methylation at Seven Loci in Various Tissues of CD1 Mice
Source: PubMed Central journal article supplement (PMC3436786; doi:10.1371/journal.pone.0044585), 2012-09-07
Supplement: pone.0044585.s002.pdf [file pone.0044585.s002.pdf]

A)

Pearson

Spearman

Males

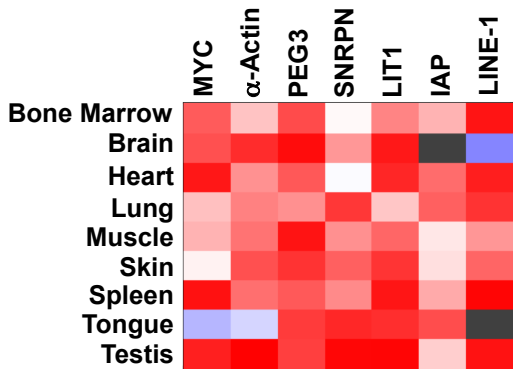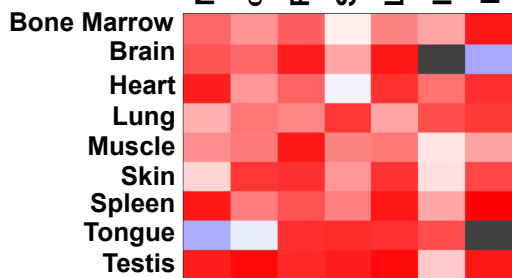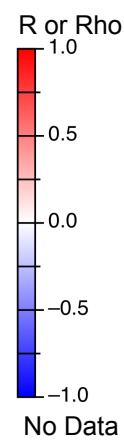

Females

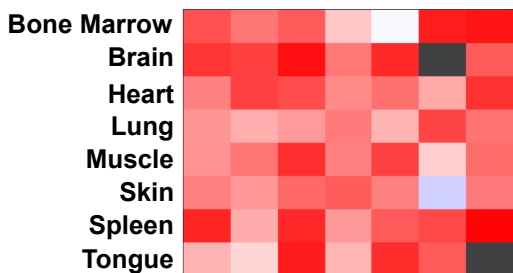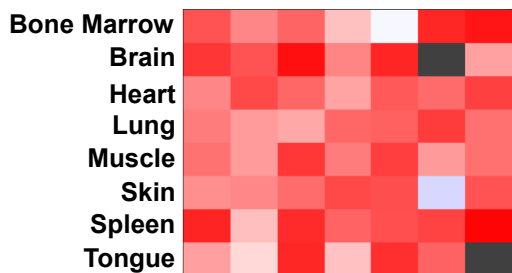

B)

Pearson

Spearman

Males

|             |        | Myc      | A-Actin  | PEG3     | SNRPN    | LIT1     | IAP      | L1       |  |     | Myc      | A-Actin  | PEG3     | SNRPN    | LIT1     | IAP      | L1       |
|-------------|--------|----------|----------|----------|----------|----------|----------|----------|--|-----|----------|----------|----------|----------|----------|----------|----------|
| Bone Marrow | $\rho$ | 0,59     | 0,42     | 0,63     | 0,06     | 0,48     | 0,35     | 0,91     |  | $r$ | 0,64     | 0,23     | 0,71     | 0,03     | 0,48     | 0,30     | 0,92     |
|             | $p$    | 1,01E-05 | 3,70E-03 | 6,96E-05 | 7,81E-01 | 1,51E-03 | 1,58E-02 | 1,75E-19 |  | $p$ | 8,38E-07 | 1,18E-01 | 3,20E-06 | 9,03E-01 | 1,39E-03 | 4,51E-02 | 6,43E-21 |
| Brain       | $\rho$ | 0,67     | 0,59     | 0,88     | 0,35     | 0,91     |          | -0,35    |  | $r$ | 0,69     | 0,83     | 0,95     | 0,41     | 0,91     |          | -0,48    |
|             | $p$    | 1,07E-06 | 1,84E-05 | 8,11E-15 | 1,35E-01 | 3,70E-18 |          | 1,72E-02 |  | $p$ | 3,96E-07 | 3,01E-12 | 4,37E-22 | 7,42E-02 | 8,95E-18 |          | 6,74E-04 |
| Heart       | $\rho$ | 0,88     | 0,41     | 0,61     | -0,05    | 0,80     | 0,55     | 0,82     |  | $r$ | 0,91     | 0,43     | 0,65     | -0,02    | 0,85     | 0,57     | 0,88     |
|             | $p$    | 3,69E-17 | 1,30E-01 | 9,85E-06 | 7,47E-01 | 4,34E-12 | 3,46E-05 | 3,77E-13 |  | $p$ | 5,27E-20 | 1,07E-01 | 1,51E-06 | 9,08E-01 | 1,26E-14 | 1,28E-05 | 1,73E-17 |
| Lung        | $\rho$ | 0,32     | 0,54     | 0,47     | 0,80     | 0,35     | 0,69     | 0,77     |  | $r$ | 0,25     | 0,49     | 0,43     | 0,78     | 0,23     | 0,62     | 0,80     |
|             | $p$    | 5,04E-02 | 8,00E-03 | 3,02E-02 | 1,38E-02 | 6,08E-02 | 2,58E-08 | 5,99E-09 |  | $p$ | 1,27E-01 | 1,69E-02 | 4,89E-02 | 1,27E-02 | 2,40E-01 | 1,25E-06 | 5,33E-10 |
| Muscle      | $\rho$ | 0,45     | 0,52     | 0,91     | 0,48     | 0,53     | 0,10     | 0,37     |  | $r$ | 0,30     | 0,55     | 0,92     | 0,43     | 0,60     | 0,10     | 0,41     |
|             | $p$    | 4,80E-03 | 1,12E-02 | 4,64E-11 | 2,55E-03 | 1,43E-04 | 5,14E-01 | 9,45E-03 |  | $p$ | 7,04E-02 | 6,59E-03 | 6,46E-12 | 7,27E-03 | 8,03E-06 | 5,16E-01 | 3,38E-03 |
| Skin        | $\rho$ | 0,16     | 0,79     | 0,81     | 0,41     | 0,80     | 0,13     | 0,72     |  | $r$ | 0,05     | 0,69     | 0,80     | 0,62     | 0,80     | 0,13     | 0,60     |
|             | $p$    | 2,65E-01 | 8,78E-03 | 9,06E-12 | 9,27E-02 | 2,41E-11 | 4,01E-01 | 9,27E-09 |  | $p$ | 7,22E-01 | 2,87E-02 | 2,85E-11 | 5,82E-03 | 4,06E-11 | 4,06E-01 | 7,56E-06 |
| Spleen      | $\rho$ | 0,91     | 0,51     | 0,67     | 0,50     | 0,91     | 0,35     | 0,98     |  | $r$ | 0,93     | 0,56     | 0,65     | 0,46     | 0,92     | 0,33     | 0,98     |
|             | $p$    | 1,14E-19 | 1,04E-03 | 1,11E-07 | 3,22E-04 | 1,47E-19 | 1,46E-02 | 7,62E-37 |  | $p$ | 4,61E-23 | 2,27E-04 | 4,07E-07 | 1,02E-03 | 1,27E-20 | 1,88E-02 | 3,27E-36 |
| Tongue      | $\rho$ | -0,32    | -0,07    | 0,82     | 0,83     | 0,81     | 0,70     |          |  | $r$ | -0,28    | -0,16    | 0,77     | 0,85     | 0,82     | 0,70     |          |
|             | $p$    | 4,30E-02 | 8,11E-01 | 1,33E-01 | 6,27E-10 | 2,41E-11 | 4,04E-08 |          |  | $p$ | 7,14E-02 | 5,95E-01 | 1,29E-01 | 1,46E-10 | 5,90E-12 | 5,30E-08 |          |
| Testis      | $\rho$ | 0,88     | 0,96     | 0,84     | 0,88     | 0,96     | 0,21     | 0,91     |  | $r$ | 0,88     | 0,99     | 0,75     | 0,98     | 0,98     | 0,19     | 0,93     |
|             | $p$    | 1,25E-15 | 3,18E-28 | 4,48E-14 | 4,33E-17 | 1,20E-06 | 1,56E-01 | 1,37E-19 |  | $p$ | 1,01E-15 | 0,00E+00 | 5,08E-10 | 2,43E-34 | 2,74E-08 | 1,97E-01 | 2,20E-22 |
| Bone Marrow | $\rho$ | 0,67     | 0,47     | 0,61     | 0,25     | -0,03    | 0,85     | 0,92     |  | $r$ | 0,68     | 0,55     | 0,64     | 0,22     | -0,03    | 0,89     | 0,92     |
|             | $p$    | 1,45E-07 | 6,91E-04 | 1,13E-04 | 2,07E-01 | 8,35E-01 | 9,26E-15 | 8,05E-20 |  | $p$ | 8,85E-08 | 6,11E-05 | 2,92E-05 | 2,56E-01 | 8,65E-01 | 2,47E-17 | 9,21E-20 |
| Brain       | $\rho$ | 0,79     | 0,68     | 0,94     | 0,48     | 0,86     |          | 0,37     |  | $r$ | 0,79     | 0,76     | 0,94     | 0,53     | 0,84     |          | 0,64     |
|             | $p$    | 1,51E-10 | 2,65E-07 | 3,90E-18 | 7,23E-02 | 1,69E-14 |          | 9,76E-03 |  | $p$ | 1,72E-10 | 1,85E-09 | 2,35E-17 | 4,01E-02 | 1,89E-13 |          | 1,01E-06 |
| Heart       | $\rho$ | 0,47     | 0,72     | 0,60     | 0,36     | 0,65     | 0,58     | 0,75     |  | $r$ | 0,49     | 0,75     | 0,70     | 0,46     | 0,56     | 0,34     | 0,80     |
|             | $p$    | 1,55E-03 | 8,81E-02 | 3,03E-05 | 1,22E-02 | 5,74E-07 | 8,31E-06 | 8,70E-10 |  | $p$ | 9,18E-04 | 5,27E-02 | 2,48E-07 | 1,25E-03 | 4,00E-05 | 1,71E-02 | 7,34E-12 |
| Lung        | $\rho$ | 0,52     | 0,39     | 0,34     | 0,60     | 0,62     | 0,76     | 0,56     |  | $r$ | 0,41     | 0,32     | 0,40     | 0,52     | 0,30     | 0,73     | 0,55     |
|             | $p$    | 2,46E-04 | 1,44E-02 | 3,35E-02 | 4,33E-03 | 6,62E-06 | 1,01E-08 | 2,13E-05 |  | $p$ | 4,31E-03 | 4,90E-02 | 1,25E-02 | 1,49E-02 | 5,17E-02 | 8,14E-08 | 3,58E-05 |
| Muscle      | $\rho$ | 0,55     | 0,39     | 0,78     | 0,51     | 0,76     | 0,40     | 0,56     |  | $r$ | 0,43     | 0,54     | 0,82     | 0,50     | 0,75     | 0,19     | 0,58     |
|             | $p$    | 1,23E-03 | 6,29E-02 | 2,83E-08 | 3,10E-04 | 1,10E-09 | 4,65E-03 | 2,64E-05 |  | $p$ | 1,69E-02 | 7,46E-03 | 1,57E-09 | 5,37E-04 | 1,95E-09 | 1,99E-01 | 1,51E-05 |
| Skin        | $\rho$ | 0,44     | 0,47     | 0,58     | 0,72     | 0,70     | -0,16    | 0,68     |  | $r$ | 0,50     | 0,41     | 0,59     | 0,64     | 0,50     | -0,18    | 0,52     |
|             | $p$    | 1,23E-03 | 2,64E-02 | 1,24E-05 | 3,98E-03 | 2,01E-08 | 2,80E-01 | 8,59E-08 |  | $p$ | 2,16E-04 | 5,97E-02 | 5,98E-06 | 1,37E-02 | 2,47E-04 | 2,07E-01 | 1,29E-04 |
| Spleen      | $\rho$ | 0,86     | 0,25     | 0,83     | 0,61     | 0,69     | 0,74     | 0,98     |  | $r$ | 0,86     | 0,33     | 0,85     | 0,40     | 0,65     | 0,72     | 0,99     |
|             | $p$    | 2,09E-14 | 2,46E-01 | 1,15E-10 | 5,75E-06 | 6,04E-08 | 6,59E-09 | 2,32E-35 |  | $p$ | 2,72E-14 | 1,28E-01 | 2,22E-11 | 5,31E-03 | 6,21E-07 | 3,38E-08 | 5,91E-37 |
| Tongue      | $\rho$ | 0,38     | 0,15     | 0,85     | 0,24     | 0,82     | 0,61     |          |  | $r$ | 0,29     | 0,16     | 0,89     | 0,29     | 0,83     | 0,64     |          |
|             | $p$    | 1,43E-02 | 4,14E-01 | 3,33E-02 | 1,10E-01 | 4,89E-13 | 2,72E-06 |          |  | $p$ | 6,01E-02 | 3,85E-01 | 1,80E-02 | 5,39E-02 | 1,26E-13 | 6,55E-07 |          |

Females
