# Supplementary material for: Measurements of DNA Methylation at Seven Loci in Various Tissues of CD1 Mice
Source: PubMed Central journal article supplement (PMC3436786; doi:10.1371/journal.pone.0044585), 2012-09-07
Supplement: pone.0044585.s003.pdf [file pone.0044585.s003.pdf]

# A) Males: mice group 1 spleen SIRPH 1 and 2 correlations

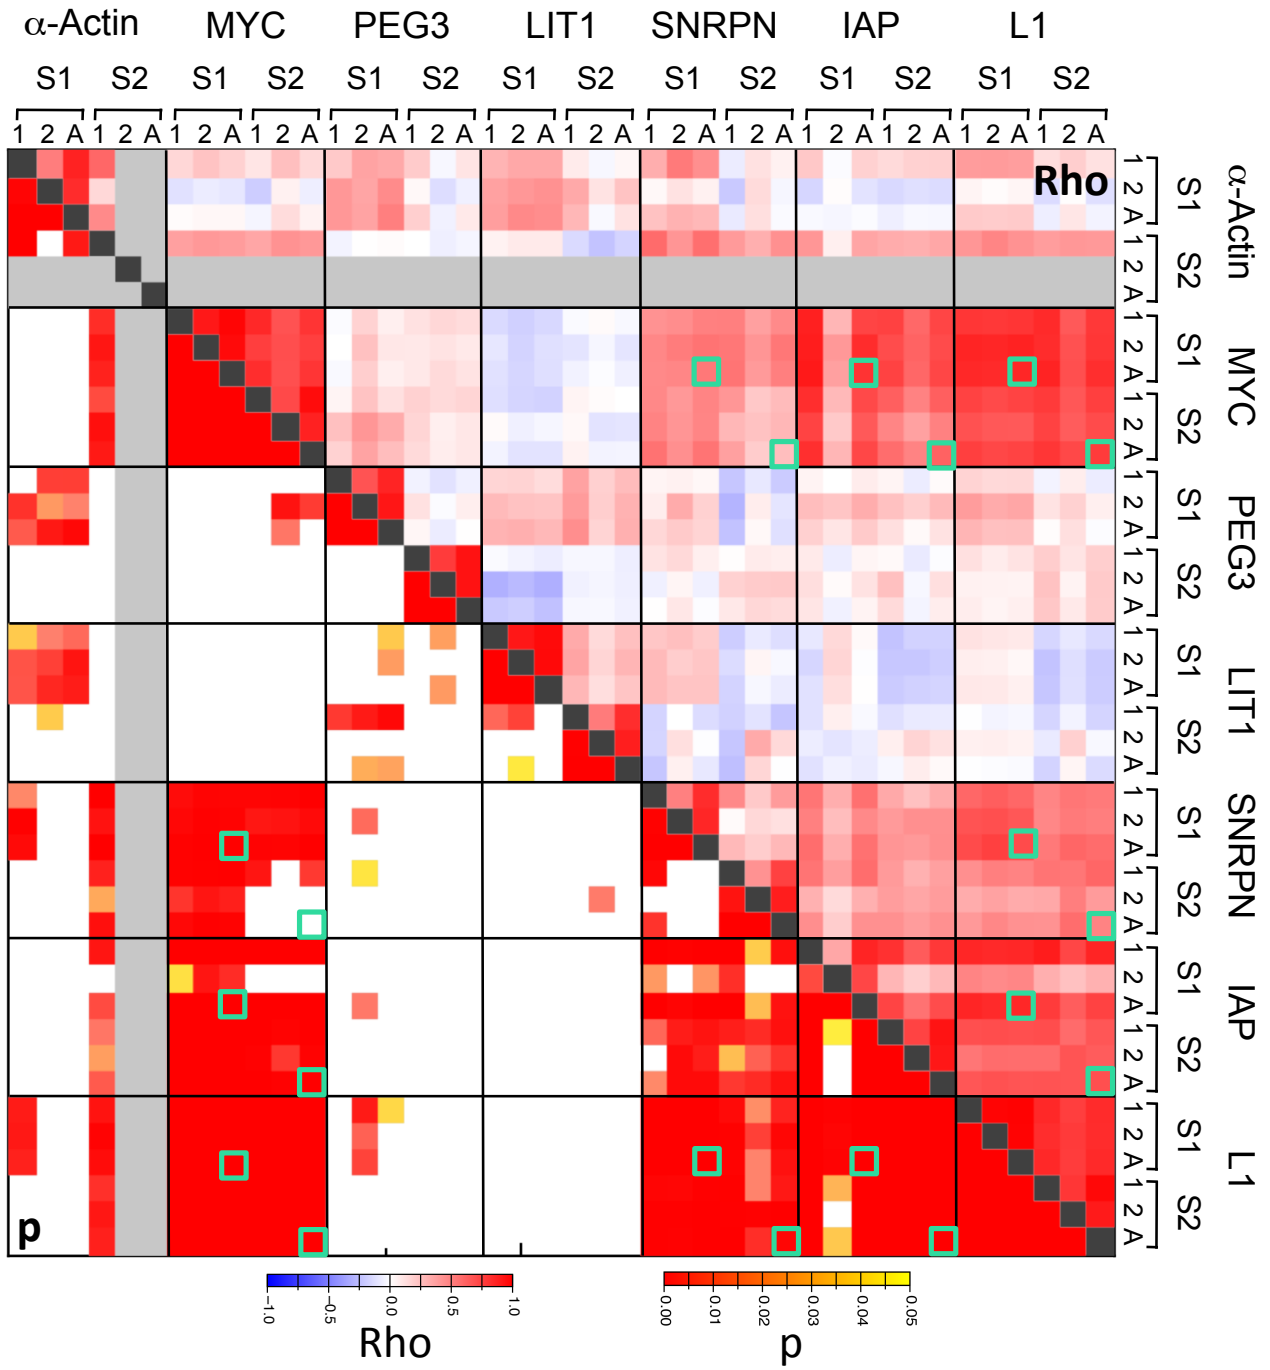

S1 and S2: First and second SIRPH experiment

1, 2 and A: CpG-1, CpG-2 and average of both

|     | $\alpha$ -Actin-1 | $\alpha$ -Actin-2 | MYC-1    | MYC-2    | PEG3-1   | PEG3-2   | LIT1-1   | LIT1-2   | SNRPN-1  | SNRPN-2  | IAP-1    | IAP-2    | L1-1     | L1-2     |
|-----|-------------------|-------------------|----------|----------|----------|----------|----------|----------|----------|----------|----------|----------|----------|----------|
| Rho | 0,60              |                   | 0,84     | 0,70     | -0,05    | -0,01    | 0,33     | 0,16     | 0,46     | 0,15     | 0,81     | 0,19     | 0,84     | 0,77     |
| P   | 7,52E-06          |                   | 3,62E-14 | 4,21E-08 | 7,25E-01 | 9,19E-01 | 2,03E-02 | 2,64E-01 | 1,32E-03 | 3,10E-01 | 4,56E-12 | 2,02E-01 | 1,62E-13 | 1,28E-10 |

## B) Females: mice cohort 1 spleen SIRPH 1 and 2 correlations

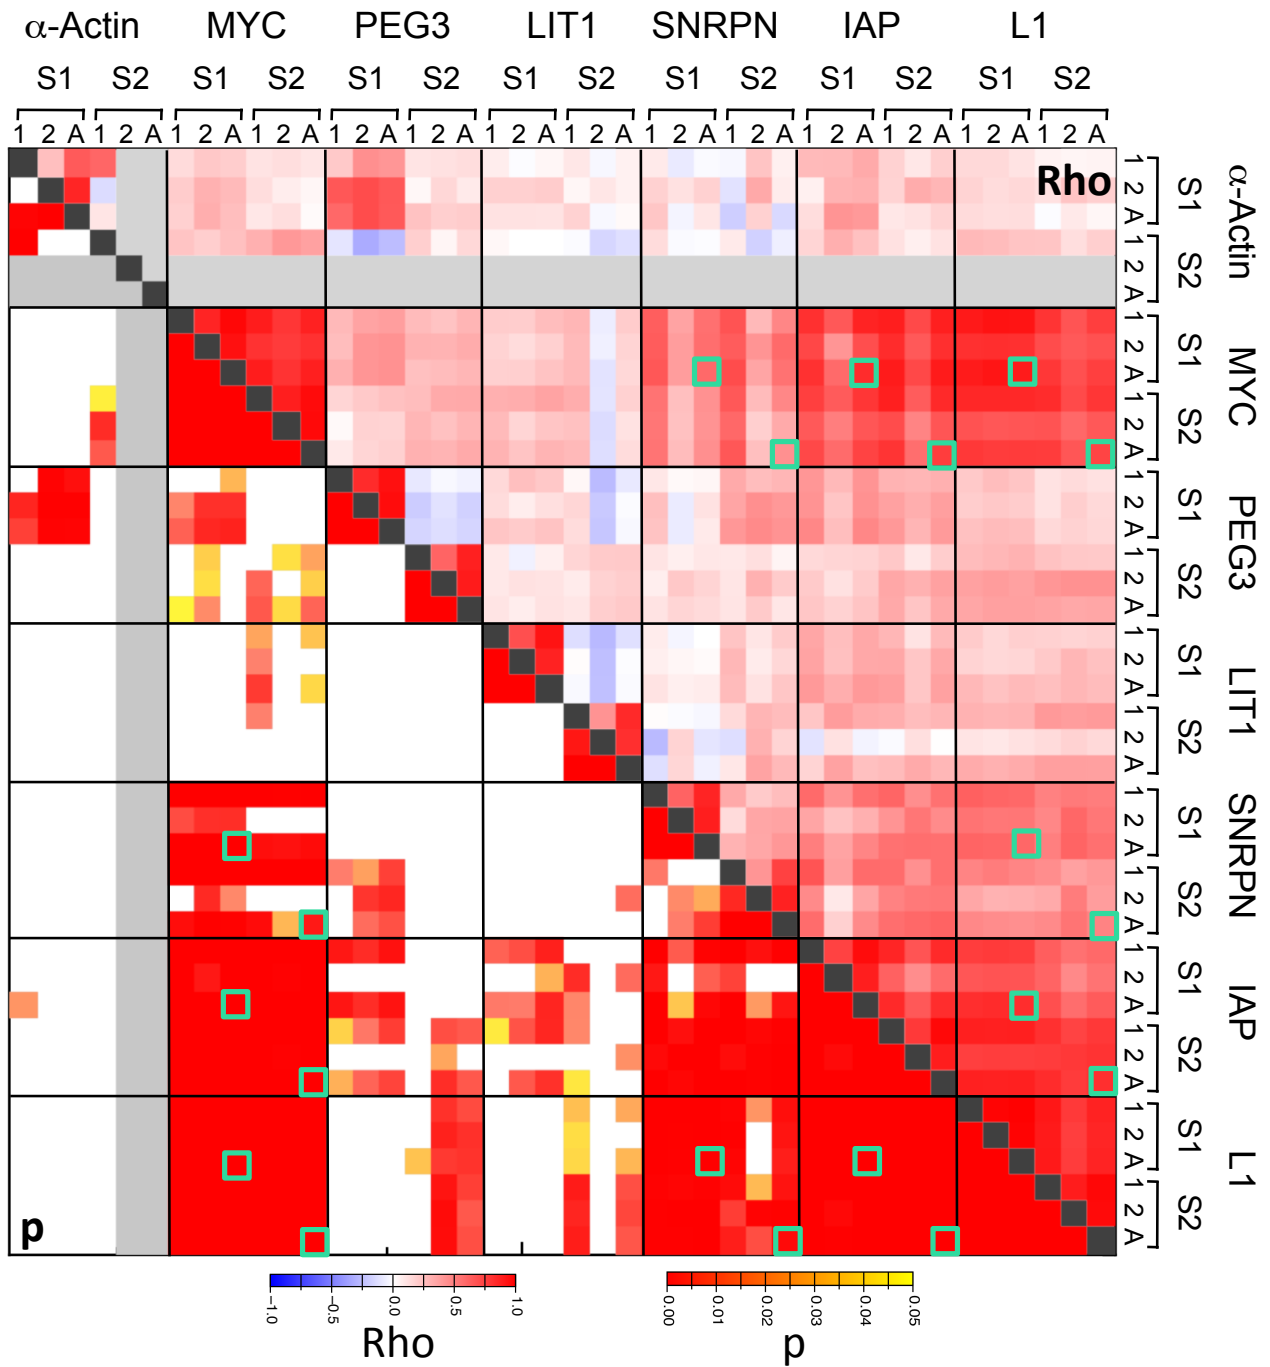

S1 and S2: First and second SIRPH experiment    1, 2 and A: CpG-1, CpG-2 and average of both

|            | $\alpha$ -Actin-1 | $\alpha$ -Actin-2 | MYC-1    | MYC-2    | PEG3-1   | PEG3-2   | LIT1-1   | LIT1-2   | SNRPN-1  | SNRPN-2  | IAP-1    | IAP-2    | L1-1     | L1-2     |
|------------|-------------------|-------------------|----------|----------|----------|----------|----------|----------|----------|----------|----------|----------|----------|----------|
| <b>Rho</b> | 0,60              |                   | 0,89     | 0,77     | -0,09    | -0,11    | -0,13    | -0,25    | 0,34     | 0,35     | 0,85     | 0,45     | 0,91     | 0,76     |
| <b>P</b>   | 8,72E-05          |                   | 1,61E-16 | 3,86E-10 | 5,54E-01 | 5,02E-01 | 3,87E-01 | 1,08E-01 | 2,37E-02 | 2,72E-02 | 4,39E-14 | 2,05E-03 | 3,16E-18 | 8,52E-10 |
