# Supplementary material for: Measurements of DNA Methylation at Seven Loci in Various Tissues of CD1 Mice
Source: PubMed Central journal article supplement (PMC3436786; doi:10.1371/journal.pone.0044585), 2012-09-07
Supplement: pone.0044585.s004.pdf [file pone.0044585.s004.pdf]

# A) Male first mice cohort spleen SIRPH vs. Pyro.

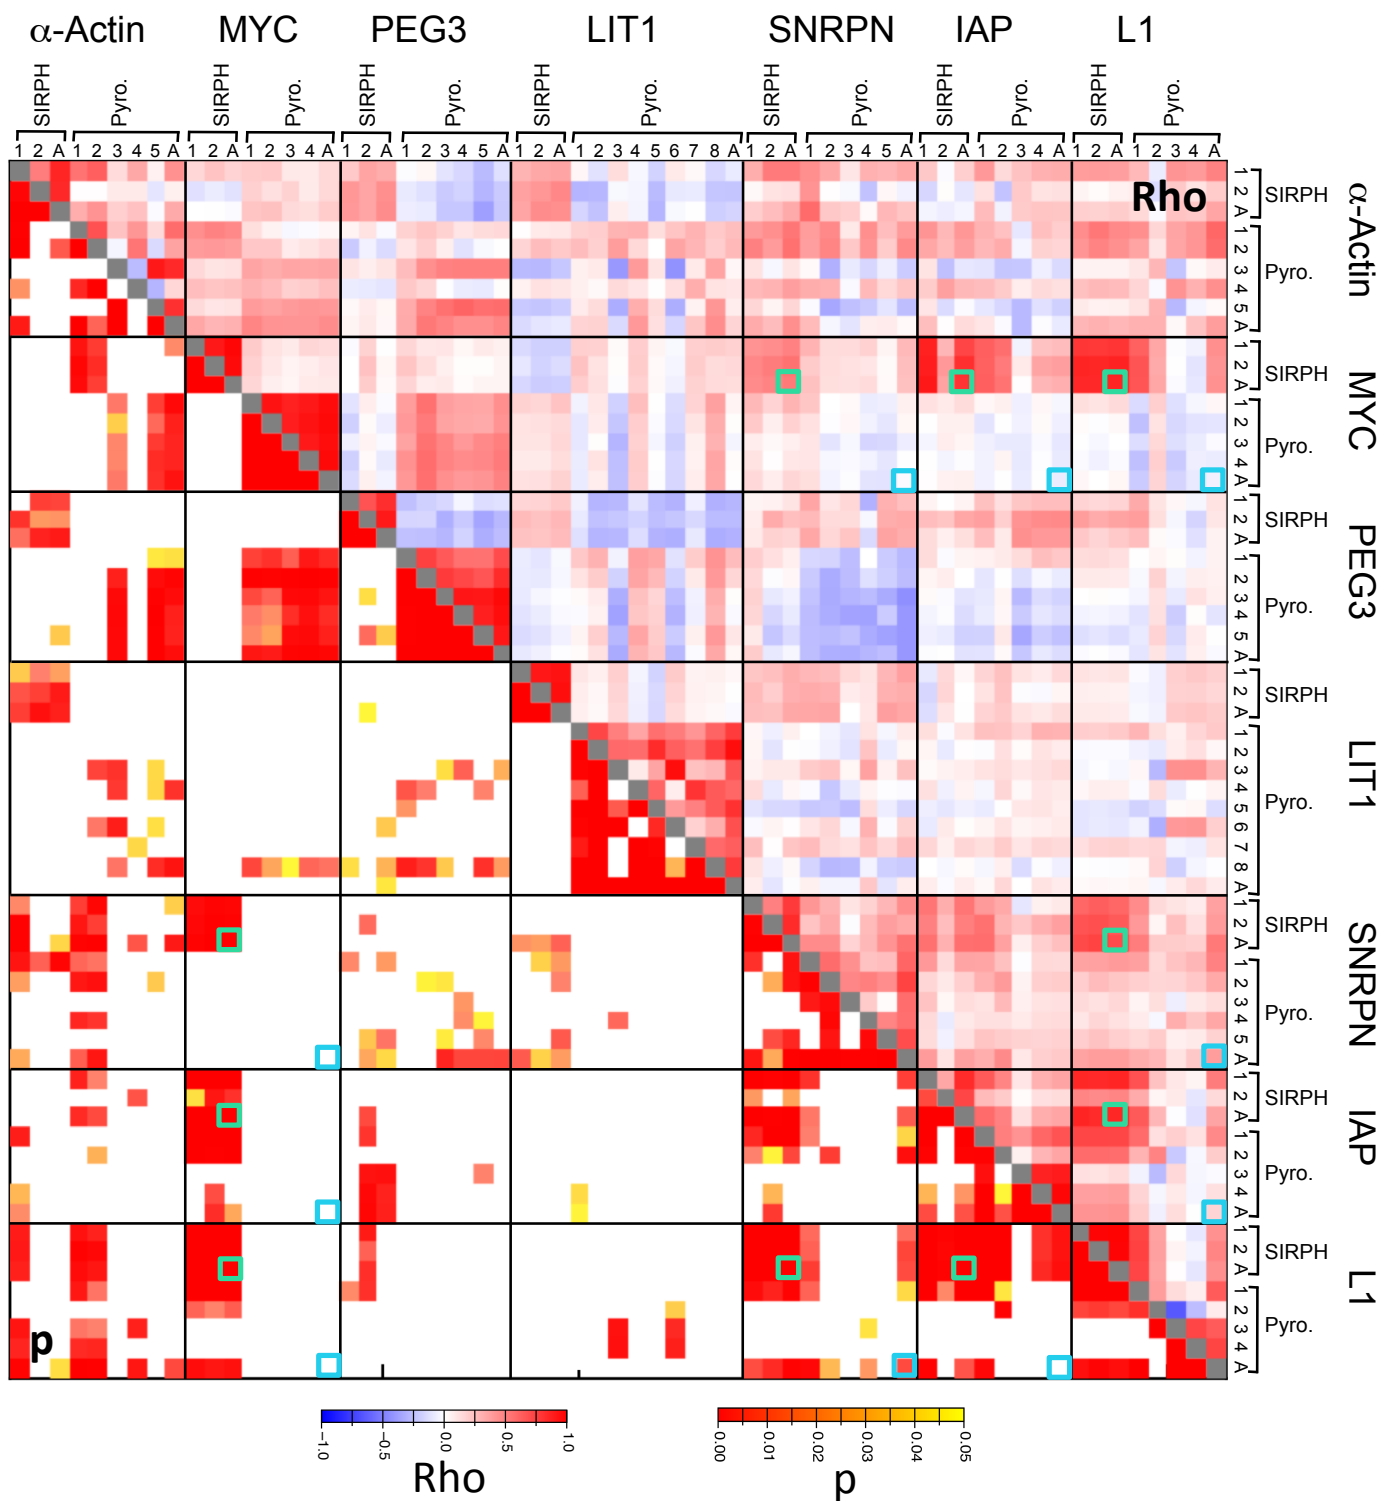

1, 2, ..., A: CpG-1, CpG-2, etc, and average;  
 note that the CpG numbers for SIRPH and Pyro. do not necessarily correspond to the same CpG.

|              | α-Actin  | α-Actin  | MYC      | MYC      | PEG3     | LIT1     | SNRPN    | IAP      | IAP      | L1       |
|--------------|----------|----------|----------|----------|----------|----------|----------|----------|----------|----------|
| <b>SIRPH</b> | 1        | 2        | 1        | 2        | 1        | 1        | 1        | 1        | 2        | 1        |
| <b>Pyro</b>  | 1        | 2        | 1        | 3        | 1        | 1        | 1        | 1        | 3        | 1        |
| <b>Rho</b>   | 0,55     | 0,01     | 0,21     | 0,05     | -0,25    | 0,10     | 0,41     | 0,65     | 0,02     | 0,74     |
| <b>P</b>     | 2,08E-04 | 9,67E-01 | 1,73E-01 | 7,69E-01 | 1,17E-01 | 5,34E-01 | 9,48E-03 | 1,21E-06 | 9,13E-01 | 8,96E-09 |

## B) Female first mice cohort spleen SIRPH vs. Pyro.

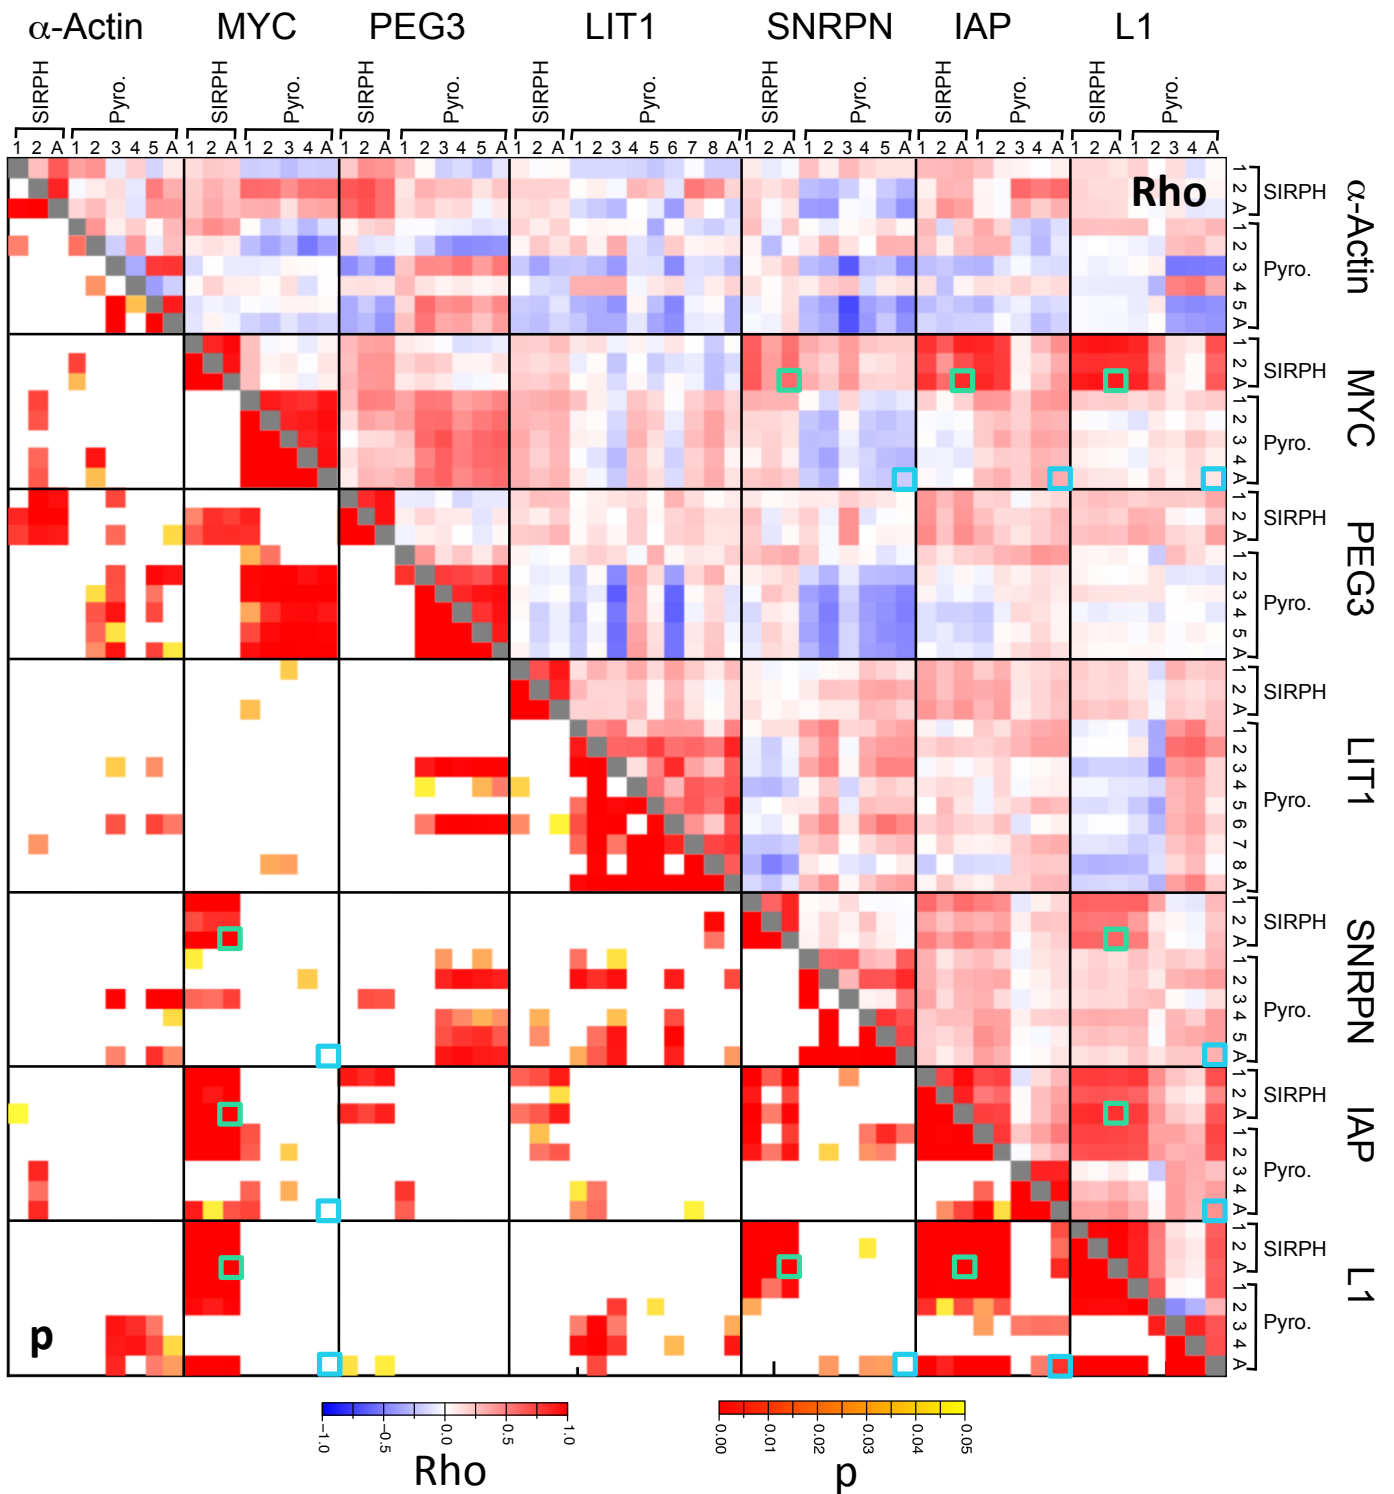

1, 2, ..., A: CpG-1, CpG-2, etc, and average;

note that the CpG numbers for SIRPH and Pyro. do not necessarily correspond to the same CpG.

|              | α-Actin  | α-Actin  | MYC      | MYC      | PEG3     | LIT1     | SNRPN    | IAP      | IAP      | L1       |
|--------------|----------|----------|----------|----------|----------|----------|----------|----------|----------|----------|
| <b>SIRPH</b> | 1        | 2        | 1        | 2        | 1        | 1        | 1        | 1        | 2        | 1        |
| <b>Pyro</b>  | 1        | 2        | 1        | 3        | 1        | 1        | 1        | 1        | 3        | 1        |
| <b>Rho</b>   | 0,37     | 0,08     | 0,25     | 0,08     | -0,08    | 0,13     | 0,02     | 0,71     | 0,02     | 0,88     |
| <b>P</b>     | 5,51E-02 | 7,86E-01 | 1,55E-01 | 6,45E-01 | 6,60E-01 | 4,57E-01 | 1,29E-01 | 5,44E-07 | 9,14E-01 | 1,34E-12 |
