# Supplementary material for: Measurements of DNA Methylation at Seven Loci in Various Tissues of CD1 Mice
Source: PLoS One. 2012 Sep 7;7(9):e44585. doi: 10.1371/journal.pone.0044585 (PMC3436786; doi:10.1371/journal.pone.0044585)
Supplement: Table S3 — p values of male-female differences by t-test or the Mann-Whitney test. Blue highlight correspond to the significant differences detected by t-test at CpG-1 in the first mice cohort. Both tests are 100% concordant for the significance. (XLS) [file pone.0044585.s007.xls]

## Sheet: t-test vs Mann-Whitney 
			t-test	Mann-Whitney test
Cohort		Variable	CpG-1	CpG-1	CpG-2	Ave.
1	Bone Marrow	MYC	0.401339	0.5457	0.7789	0.997
		Alpha_Actin	0.598465	0.5104	0.9393	0.9939
		PEG3	0.0874378	0.0352	0.2029	0.0432
		SNRPN	6.88534e-05	< 0,0001	0.0845	0.0022
		LIT1	1.03713e-05	< 0,0001	0.1566	0.0012
		IAP	8.63212e-05	0.0002	0.2593	0.8624
		L1	0.218155	0.199	0.106	0.0979
1	Brain	MYC	0.00894007	0.0098	0.4039	0.0376
		Alpha_Actin	0.0559346	0.0933	0.0011	0.0047
		PEG3	0.00100214	0.0005	0.0036	0.0063
		SNRPN	0.721863	0.1543	0.2813	0.1334
		LIT1	0.000130575	0.0005	< 0,0001	< 0,0001
		IAP	0.00116926	0.0017		0.0017
		L1	0.362891	0.1474	0.8042	0.8766
1	Heart	MYC	0.0567524	0.0581	0.0513	0.0456
		Alpha_Actin	0.803602	0.9799	0.7757	0.9799
		PEG3	0.72459	0.9508	0.302	0.3007
		SNRPN	0.042406	0.0274	0.2859	0.0519
		LIT1	0.786988	0.9885	0.9884	0.8621
		IAP	0.307225	0.6941	0.1429	0.7561
		L1	0.000168033	< 0,0001	< 0,0001	< 0,0001
1	Lung	MYC	0.00469404	0.01	0.3676	0.0381
		Alpha_Actin	0.00226278	0.0013	0.0358	0.0031
		PEG3	0.337762	0.1903	0.0584	0.0755
		SNRPN	1.94621e-09	< 0,0001	0.0013	< 0,0001
		LIT1	4.10275e-07	< 0,0001	0.0151	0.0008
		IAP	5.50891e-07	< 0,0001	< 0,0001	< 0,0001
		L1	0.277223	0.0849	0.9124	0.8301
1	Muscle	MYC	0.193184	0.4453	0.7419	0.4345
		Alpha_Actin	0.00764425	0.0158	0.3431	0.0109
		PEG3	0.00145772	0.0007	0.1896	0.0833
		SNRPN	0.987202	0.2761	0.1271	0.0726
		LIT1	0.374974	0.4023	0.5128	0.5019
		IAP	0.1622	0.3528	0.4075	0.239
		L1	0.0796977	0.1228	0.2627	0.0645
1	Skin	MYC	0.180368	0.2472	0.229	0.9596
		Alpha_Actin	0.0576087	0.064	0.8383	0.0861
		PEG3	1.06394e-05	< 0,0001	0.0001	< 0,0001
		SNRPN	0.124664	0.1542	0.0523	0.1542
		LIT1	6.55586e-11	< 0,0001	< 0,0001	< 0,0001
		IAP	1.59547e-06	< 0,0001	0.5348	0.0001
		L1	0.597208	0.8297	0.6037	0.8154
1	Spleen	MYC	0.0734811	0.1909	1	0.4755
		Alpha_Actin	0.257949	0.3307	0.3026	0.5543
		PEG3	0.0616322	0.5612	0.2966	0.1406
		SNRPN	0.43737	0.7858	0.0635	0.6671
		LIT1	0.0157094	0.0108	0.0011	0.0027
		IAP	0.176462	0.3962	< 0,0001	0.0095
		L1	0.49695	0.5953	0.9431	0.6507
1	Tongue	MYC	0.016763	0.0239	< 0,0001	0.0007
		Alpha_Actin	1.28762e-05	< 0,0001	0.0012	0.0004
		PEG3	5.01583e-10	0.0352	0.0055	< 0,0001
		SNRPN	1.04916e-26	< 0,0001	< 0,0001	< 0,0001
		LIT1	7.0723e-15	< 0,0001	< 0,0001	< 0,0001
		IAP	0.906028	0.9188	0.8719	0.8049
		L1	3.54288e-11	< 0,0001
